# Supplementary material for: Coexpression Analysis of Tomato Genes and Experimental Verification of Coordinated Expression of Genes Found in a Functionally Enriched Coexpression Module
Source: PubMed Central journal article supplement — DNA Res. 2010 Feb 3;17(2):105–16. doi: 10.1093/dnares/dsq002 (PMC2853382; doi:10.1093/dnares/dsq002), 2010-02-03
Supplement: dsq002_1.pdf [file dsq002_1.pdf]

**Supplementary data 2.** Construction of *CaMV35S:GFP-ZnF* and *CaMV35S:ZnF-GFP* fusion constructs.

(1) *CaMV35S:GFP-ZnF*

Protein coding region of *sGFP(S65T)* was amplified by PCR using *CaMV35S-sGFP(S65T)-nos3'* vector<sup>1</sup> as a template with restriction site-containing primers,

5'-GGGCCATGGTGAGCAAGGGCGAGGAGCTG-3' and

5'-CCCATATGGCTTCCTCCTCCCTTGTACAGCTCGTCCATGCCGTG -3'. Protein coding region of *ZnF* was amplified by PCR using LEFL2003DB10 (accession number AK326277) as a

template with restriction site-containing primers,

5'-GGGCATATGGCAGTTGGGCAAGACATCTC-3' and

5'-TTTGCGGCCGCTCAAGAAGACATGTTAACATGCAC-3'. PCR products were cloned into pCR-BluntII-TOPO (Invitrogen, <http://www.invitrogen.com/site/us/en/home.html>). Fragments of *sGFP(S65T)* (excised by Nco I and Nde I), *ZnF* (excised by Nde I and Not I) and

*CaMV35S-sGFP(S65T)-nos3'* vector (excised by Nco I and Not I) were mixed and ligated with a DNA ligase, Ligation High (TOYOBO Life Science,

<http://www.toyobo.co.jp/e/seihin/xr/lifescience/index.html>). Resulting vector contains

*sGFP(S65T)-ZnF* fusion instead of *sGFP(S65T)* between NcoI site and Not I site of the *CaMV35S-sGFP(S65T)-nos3'* vector.

(2) *CaMV35S:ZnF-GFP*

Protein coding region of *ZnF* was amplified by PCR using LEFL2003DB10 as a template with restriction site-containing primers, 5'-GGGCCATGGAGTTGAGGCAAGACATCTC-3' and 5'-CC

CATATGGCTTCCTCCTCCAGAAGACATGTTAACATGCACAGT-3'. Protein coding region of

*sGFP(S65T)* was amplified by PCR using *CaMV35S-sGFP(S65T)-nos3'* vector as a template with restriction site-containing primers, 5'-GGGCATATGGTGAGCAAGGGCGAGGAGCTG-3' and

5'-TTTGCGGCCGCTTACTTGTACAGCTCGTCCATGCC -3'. PCR products were cloned into

pCR-BluntII-TOPO (Invitrogen). Fragments of *ZnF* (excised by Nco I and Nde I), *sGFP(S65T)*

(excised by Nde I and Not I) and *CaMV35S-sGFP(S65T)-nos3'* vector (excised by Nco I and Not I) were mixed and ligated with a DNA ligase, Ligation High (TOYOBO Life Science). Resulting

vector contains *ZnF-sGFP(S65T)* fusion instead of *sGFP(S65T)* between NcoI site and Not I site of the *CaMV35S-sGFP(S65T)-nos3'* vector.

**Reference**

1. Chiu, W., Niwa, Y., Zeng, W., Hirano, T., Kobayashi, H. and Sheen, J. 1996, Engineered GFP as a vital reporter in plants, *Curr Biol*, **6**, 325-330
